# Supplementary material
Source: PubMed Central journal article supplement (PMC5213916)
Supplement: jciinsight-2-89504-s001.pdf [file jciinsight-2-89504-s001.pdf]

## **Supplemental Figure 1**

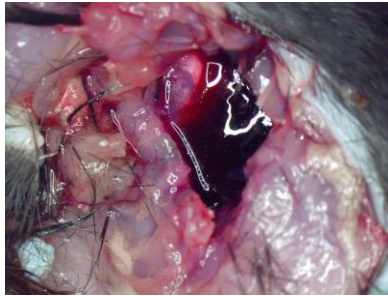

**Thoracic cavity**

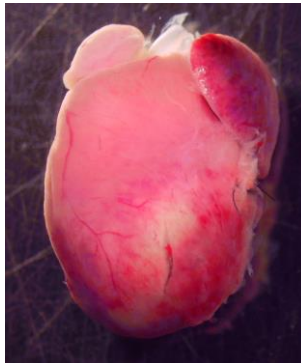

**Whole heart**

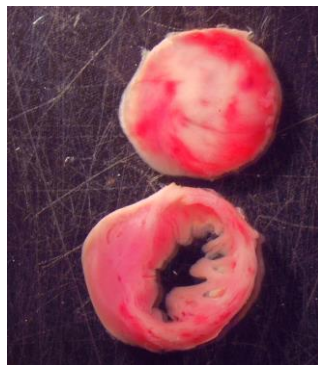

**Transverse section**

Supplemental Figure 1. Necropsy results. Representative photographs of necropsy-proven cardiac rupture. The thoracic cavity is filled with blood.

## Supplemental Figure 2

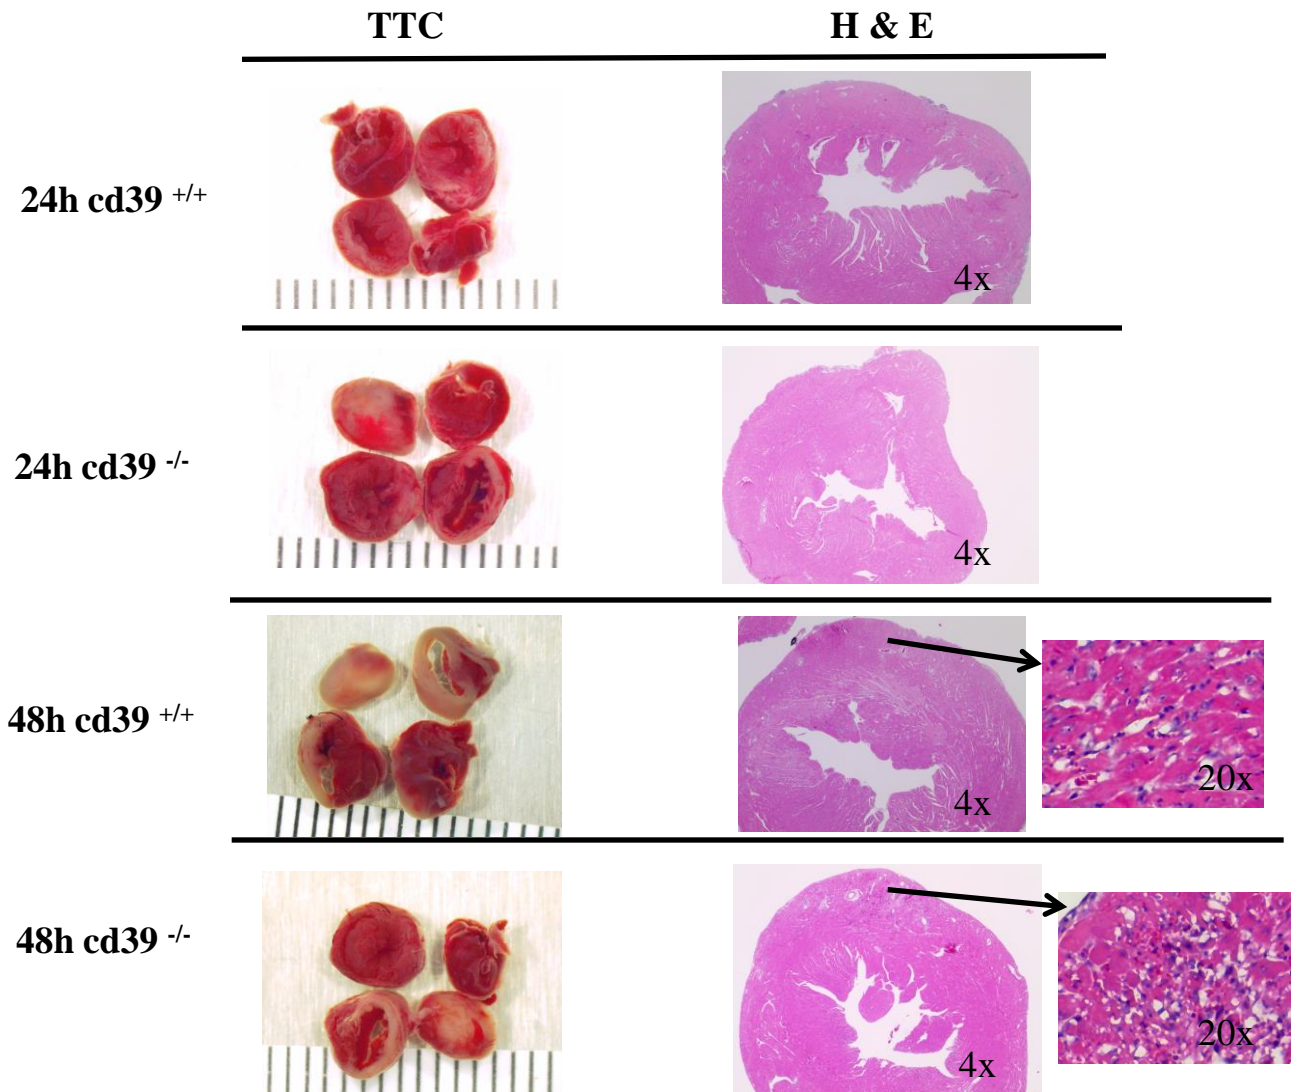

Supplemental Figure 2. Representative histology after myocardial infarction. Representative TTC and H&E staining for  $cd39^{+/+}$  and  $cd39^{-/-}$  mice at 24 h and 48 h after myocardial infarction. 48 h H&E with 20x magnification demonstrating density of inflammatory cells in  $cd39^{-/-}$  hearts relative to  $cd39^{+/+}$  hearts.

Supplemental Figure 3

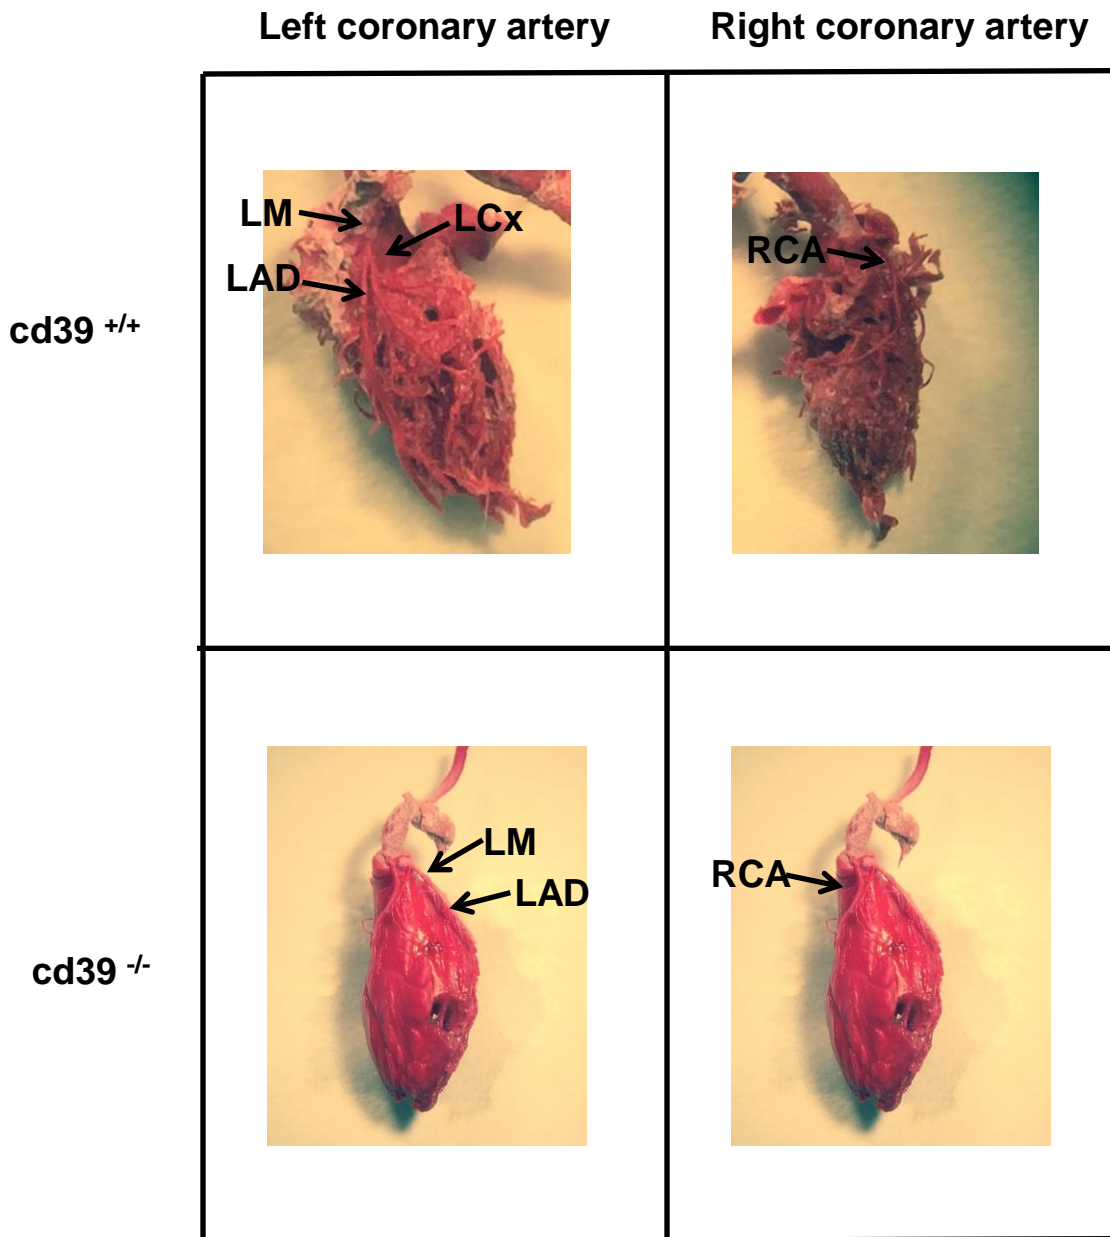

Supplemental Figure 3. Coronary artery anatomy. Representative photographs of plastination models demonstrating no differences in the origin or course of the major epicardial coronary arteries of *cd39<sup>+/+</sup>* and *cd39<sup>-/-</sup>* mice. LM = left main coronary artery, LAD = left anterior descending coronary artery, LCx = left circumflex coronary artery, RCA = right coronary artery. n = 3 per group.

Supplemental Figure 4

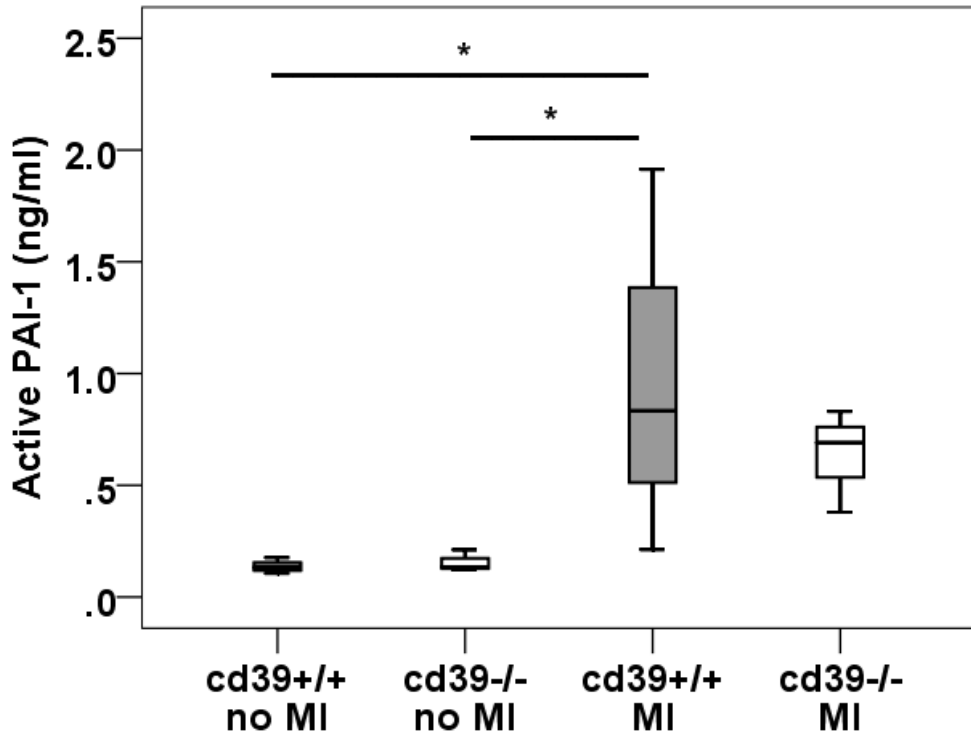

Supplemental Figure 4. Plasminogen-activator inhibitor-1 (PAI-1) activity. PAI-1 activity at baseline in myocardium and in infarcted myocardium three days after permanent coronary occlusion. PAI-1 activity increased after myocardial infarction (MI) in both groups. There was no difference in PAI-1 activity between *cd39*<sup>+/+</sup> and *cd39*<sup>-/-</sup> mice after MI. *n* = 3-4 per group. 1-way ANOVA \* *p* < 0.05. Box and whisker plots show median (line within box), upper and lower quartiles (bounds of box), and minimum and maximum values (bars).

## Supplemental Figure 5

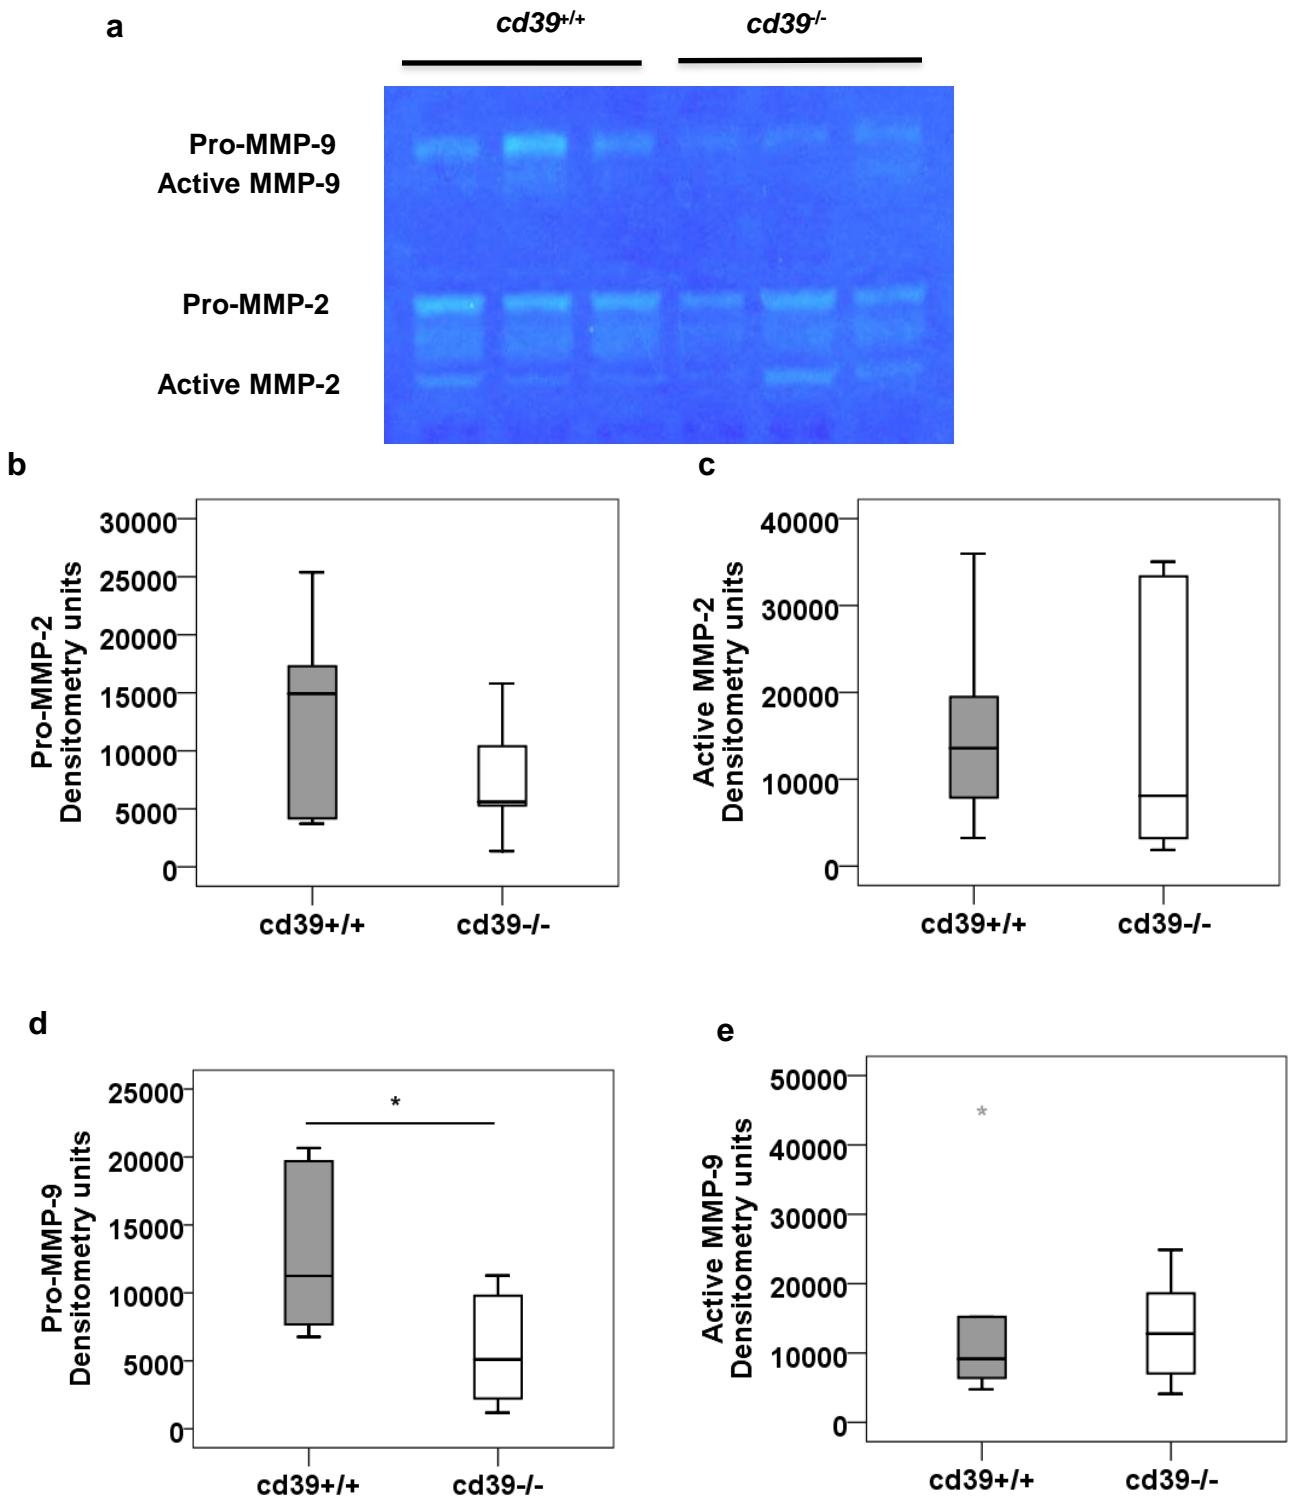

Supplemental Figure 5. Matrix metalloproteinase activity. (a) Zymogram and (b-e) quantification of bands demonstrating MMP activity in the infarct and peri-infarct regions of myocardium three days after myocardial infarction. No difference was seen in (b) pro-MMP-2 or (c) active MMP-2 activity. Increased (d) pro-MMP-9 but not (e) active MMP-9 was noted in *cd39<sup>+/+</sup>* mice compared to *cd39<sup>-/-</sup>* mice.  $n = 6$  per group. MMP activity was undetectable in sham controls (data not shown). Student's t-test  $*p < 0.05$ . Box and whisker plots show median (line within box), upper and lower quartiles (bounds of box), and minimum and maximum values (bars).

## Supplemental Tables

**Supplemental Table 1**

| <b>Genotype</b>           | <b>Systolic blood pressure</b> | <b>Heart rate</b> |
|---------------------------|--------------------------------|-------------------|
| <i>cd39<sup>+/+</sup></i> | 94.6 ± 9.5                     | 551 ± 37.6        |
| <i>cd39<sup>-/-</sup></i> | 96.6 ± 6.4                     | 551 ± 78.5        |
| <i>p</i>                  | NS                             | NS                |

Supplemental Table 1. Post-infarction blood pressure and heart rate. Blood pressures and heart rates were obtained on acclimatized mice by tail cuff 24 h after myocardial infarction. n = 3-4 per group. Student's t-test. NS, not significant. Data are shown as mean ± sd.

**Supplemental Table 2**

| <b>Genotype</b>                                     | <b>Systolic blood pressure</b> | <b>Heart rate</b> |
|-----------------------------------------------------|--------------------------------|-------------------|
| <i>cd39<sup>+/+</sup></i>                           | 116 ± 12.6                     | 593 ± 59.6        |
| <i>cd39<sup>-/-</sup></i>                           | 107 ± 7.3                      | 560 ± 30.9        |
| <i>cd39<sup>flox/flox</sup></i>                     | 114 ± 9.8                      | 545 ± 39.7        |
| <i>cd39<sup>flox/flox</sup>LysM<sup>Cre/-</sup></i> | 115 ± 10.4                     | 551 ± 42.5        |
| <i>p</i>                                            | NS                             | NS                |

Supplemental Table 2. Cardiac phenotype of *cd39<sup>+/+</sup>*, *cd39<sup>-/-</sup>*, *cd39<sup>flox/flox</sup>*, and *cd39<sup>flox/flox</sup>LysM<sup>Cre/-</sup>* mice. Blood pressures and heart rates were obtained on acclimatized mice by tail cuff. n = 4 per group. 1-way ANOVA. NS, not significant. Data are shown as mean ± sd.

### Supplemental Table 3

**Table 3**

| <b>Genotype</b>                                     | <b>LV EF (%)</b> | <b>LVDd (mm)</b> | <b>IVSd (mm)</b> | <b>LVPWd (mm)</b> |
|-----------------------------------------------------|------------------|------------------|------------------|-------------------|
| <i>cd39<sup>+/+</sup></i>                           | 45 ± 10.1        | 21 ± 1.4         | 0.73 ± 0.09      | 0.75 ± 0.10       |
| <i>cd39<sup>-/-</sup></i>                           | 57 ± 8.2         | 23 ± 3.9         | 0.75 ± 0.05      | 0.68 ± 0.10       |
| <i>cd39<sup>flox/flox</sup></i>                     | 50 ± 11.6        | 23 ± 1.6         | 0.63 ± 0.13      | 0.62 ± 0.05       |
| <i>cd39<sup>flox/flox</sup>LysM<sup>Cre/-</sup></i> | 54 ± 3.2         | 24 ± 0.7         | 0.72 ± 0.07      | 0.70 ± 0.09       |
| <i>p</i>                                            | NS               | NS               | NS               | NS                |

Supplemental Table 3. Echocardiographic findings from *cd39<sup>+/+</sup>*, *cd39<sup>-/-</sup>*, *cd39<sup>flox/flox</sup>*, and *cd39<sup>flox/flox</sup>LysM<sup>Cre/-</sup>* mice. Baseline echocardiographic measurements were obtained. Left ventricular ejection fraction (LV EF), left ventricular diastolic dimension (LVDd), interventricular septal wall thickness (IVSd), left ventricular posterolateral wall thickness (LVPWd). n = 4 per group. 1-way ANOVA. NS, not significant. Data are shown as mean ± sd.
